# Supplementary material for: Stenotrophomonas maltophilia: A Gram-Negative Bacterium Useful for Transformations of Flavanone and Chalcone
Source: PubMed Central journal article supplement (PMC6150369; doi:10.3390/molecules22111830), 2017-10-27

## Supplementary Data

### *Stenotrophomonas maltophilia: a Gram-negative bacterium useful for transformations of flavanone and chalcone*

Edyta Kostrzewa-Susłow <sup>1,\*</sup>, Monika Dymarska <sup>1</sup>, Urszula Guzik <sup>2</sup>, Danuta Wojcieszynska <sup>2</sup> and Tomasz Janeczko <sup>1</sup>

<sup>1</sup> Department of Chemistry, Faculty of Biotechnology and Food Science, Wrocław University of Environmental and Life Sciences, Norwida 25, 50-375 Wrocław, Poland

<sup>2</sup> Department of Biochemistry, Faculty of Biology and Environmental Protection, University of Silesia in Katowice, Jagiellonska 28, 40-032 Katowice, Poland

\* Correspondence: ekostrzew@gmail.com; Tel.: +48-71-320-5195

#### Content

Figure S1. <sup>1</sup>H NMR spectrum of 7-methoxyflavanone (**1**) (THF-d<sub>8</sub>, 600 MHz)

Figure S2. <sup>13</sup>C NMR spectrum of 7-methoxyflavanone (**1**) (THF-d<sub>8</sub>, 151 MHz)

Figure S3. <sup>1</sup>H NMR spectrum of 5, 7-dimethoxyflavanone (**2**) (THF-d<sub>8</sub>, 600 MHz)

Figure S4. <sup>13</sup>C NMR spectrum of 5, 7-dimethoxyflavanone (**2**) (THF-d<sub>8</sub>, 151 MHz)

Figure S5. <sup>1</sup>H NMR spectrum of 2'-hydroxy-3-methoxychalcone (**3**) (CDCl<sub>3</sub>, 600 MHz)

Figure S6. <sup>13</sup>C NMR spectrum of 2'-hydroxy-3-methoxychalcone (**3**) (CDCl<sub>3</sub>, 151 MHz)

Figure S7. <sup>1</sup>H NMR spectrum of 2'-hydroxy-4'-methoxychalcone (**4**) (CDCl<sub>3</sub>, 600 MHz)

Figure S8. <sup>13</sup>C NMR spectrum of 2'-hydroxy-4'-methoxychalcone (**4**) (CDCl<sub>3</sub>, 151 MHz)

Figure S9. <sup>1</sup>H NMR spectrum of 2'-hydroxy-4'-methoxydihydrochalcone (**5**) (CDCl<sub>3</sub>, 600 MHz)

Figure S10. <sup>13</sup>C NMR spectrum of 2'-hydroxy-4'-methoxydihydrochalcone (**5**) (CDCl<sub>3</sub>, 151 MHz)

Figure S11. <sup>1</sup>H NMR spectrum of 3, 7, 8-trihydroxyflavone (**6**) (CDCl<sub>3</sub>, 600 MHz)

Figure S12. <sup>13</sup>C NMR spectrum of 3, 7, 8-trihydroxyflavone (**6**) (CDCl<sub>3</sub>, 151 MHz)

Figure S13. <sup>1</sup>H NMR spectrum of 7-hydroxyflavanone (**7**) (THF, 600 MHz)

Figure S14. <sup>13</sup>C NMR spectrum of 7-hydroxyflavanone (**7**) (THF, 151 MHz)

Figure S15. <sup>1</sup>H NMR spectrum of 2'-hydroxy-4', 6'-dimethoxychalcone (**8**) (CDCl<sub>3</sub>, 600 MHz)

Figure S16. <sup>13</sup>C NMR spectrum of 2'-hydroxy-4', 6'-dimethoxychalcone (**8**) (CDCl<sub>3</sub>, 151 MHz)

Figure S17. <sup>1</sup>H NMR spectrum of 2'-hydroxy-4', 6'-dimethoxydihydrochalcone (**9**) (CDCl<sub>3</sub>, 600 MHz)

Figure S18. <sup>13</sup>C NMR spectrum of 2'-hydroxy-4', 6'-dimethoxydihydrochalcone (**9**) (CDCl<sub>3</sub>, 151 MHz)

Figure S19. <sup>1</sup>H NMR spectrum of 2'-hydroxy-3-methoxydihydrochalcone (**10**) (CDCl<sub>3</sub>, 600 MHz)

Figure S20. <sup>13</sup>C NMR spectrum of 2'-hydroxy-3-methoxydihydrochalcone (**10**) (CDCl<sub>3</sub>, 151 MHz)

Figure S21. <sup>1</sup>H NMR spectrum of 3'-methoxyflavanone (**11**) (CDCl<sub>3</sub>, 600 MHz)

Figure S22. <sup>13</sup>C NMR spectrum of 3'-methoxyflavanone (**11**) (CDCl<sub>3</sub>, 151 MHz)

Figure S1. <sup>1</sup>H NMR spectrum of 7-methoxyflavanone (1) (THF-d<sub>8</sub>, 600 MHz)

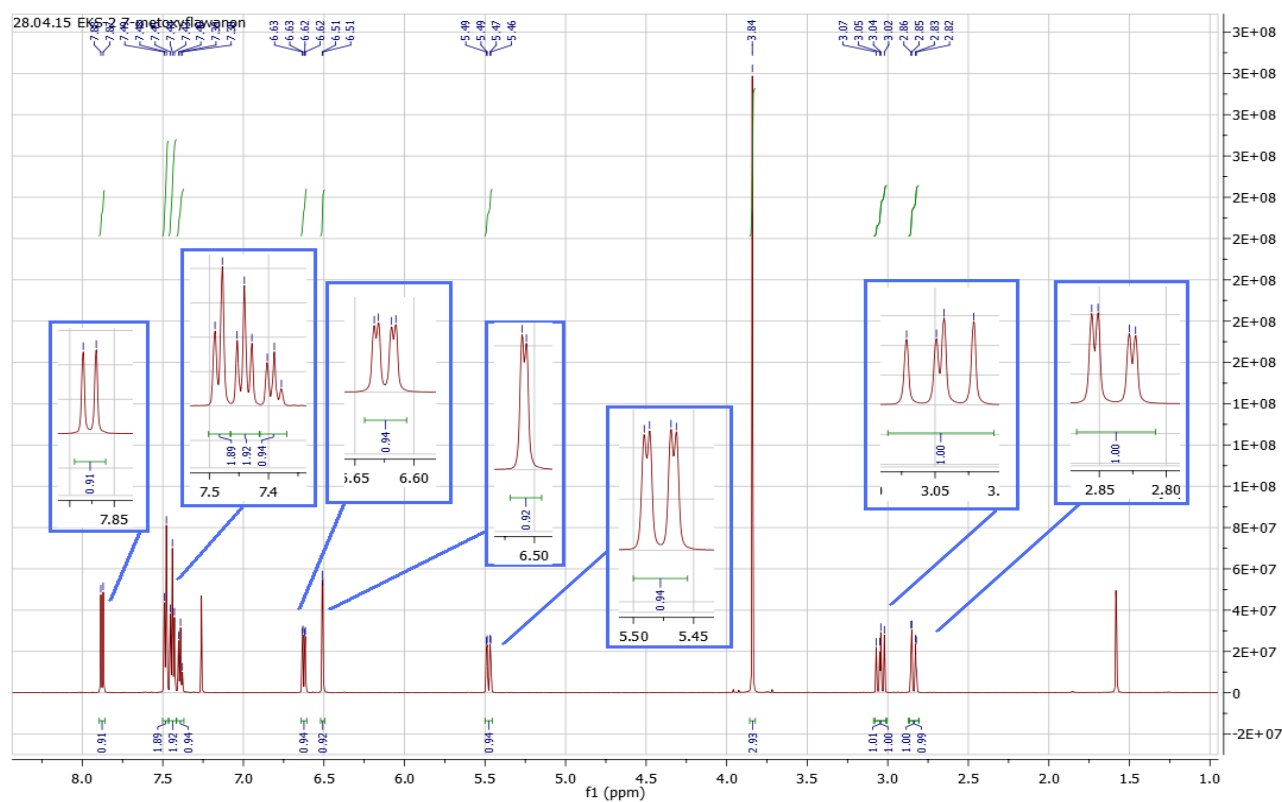

Figure S2. <sup>13</sup>C NMR spectrum of 7-methoxyflavanone (1) (THF-d<sub>8</sub>, 151 MHz)

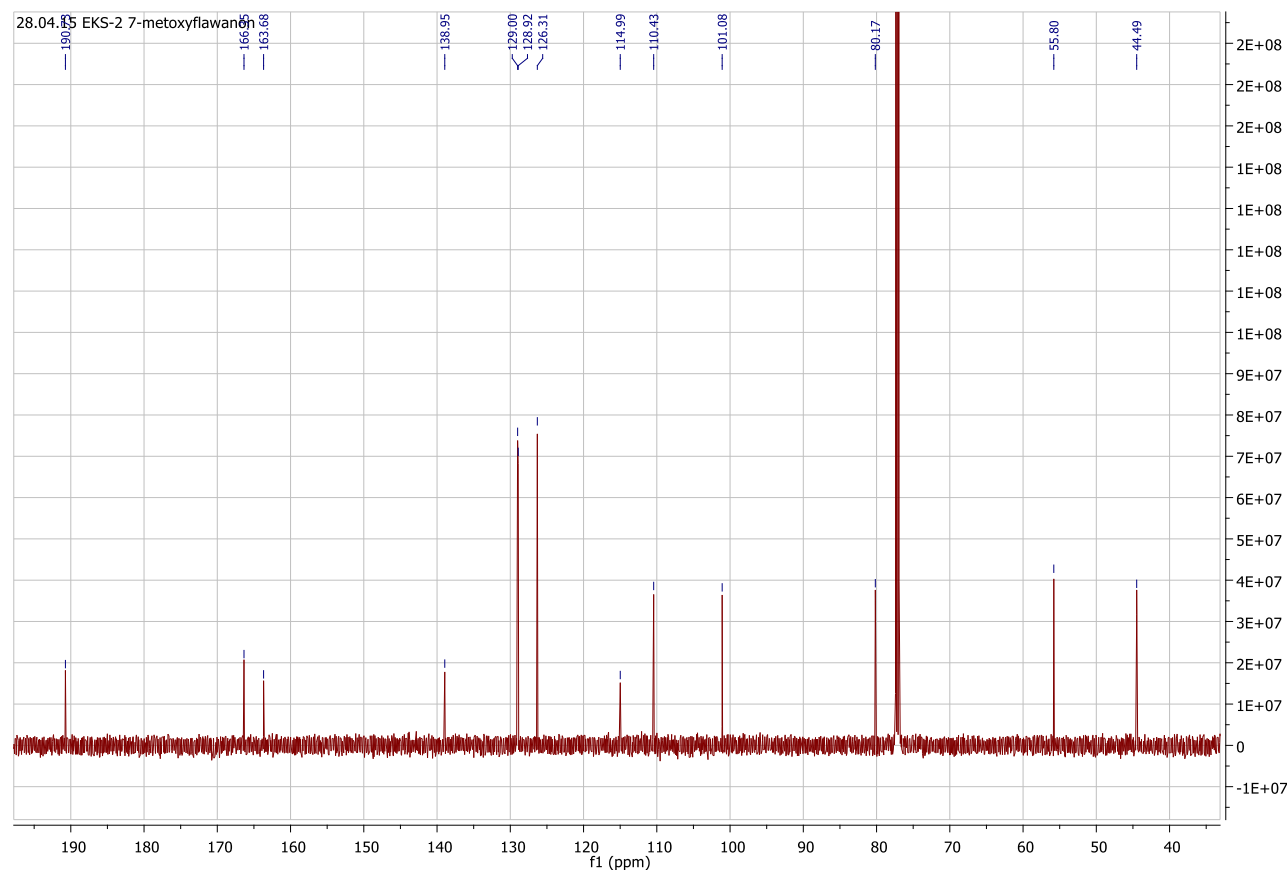

Figure S3.  $^1\text{H}$  NMR spectrum of 5, 7-dimethoxyflavanone (**2**) (THF- $d_6$ , 600 MHz)

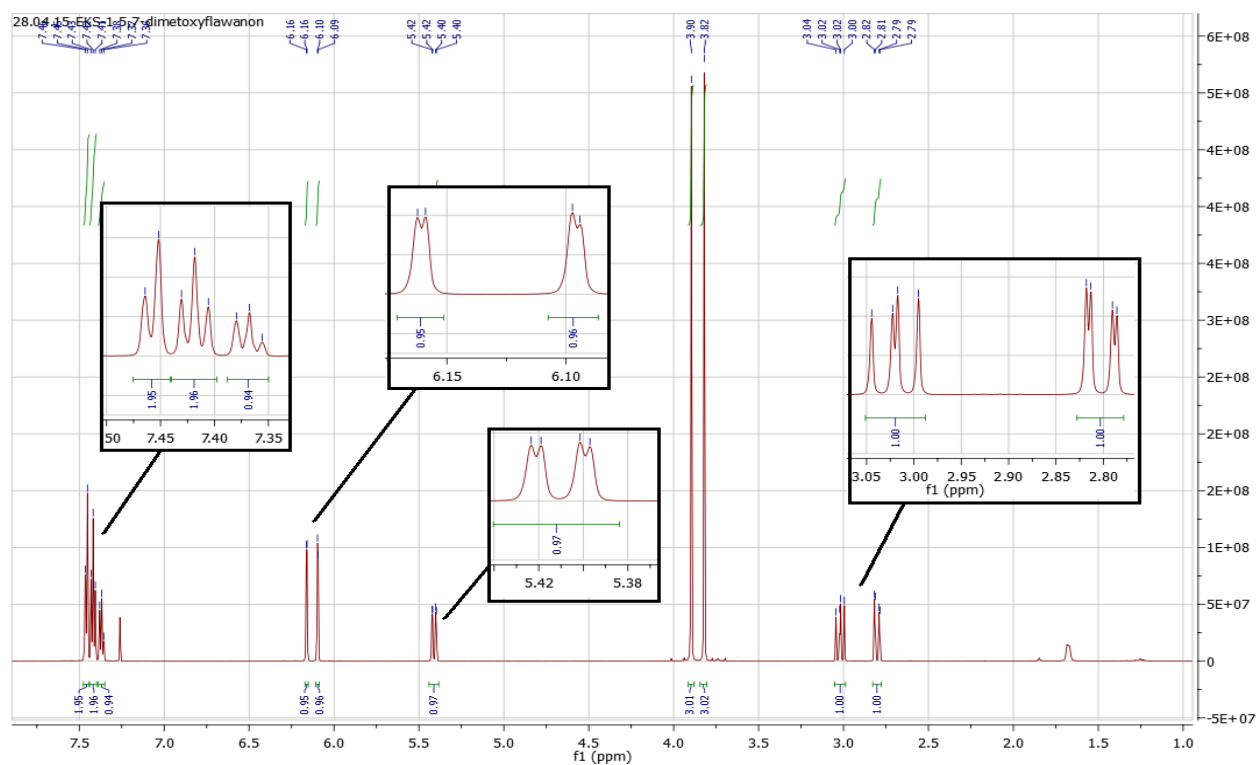

Figure S4.  $^{13}\text{C}$  NMR spectrum of 5, 7-dimethoxyflavanone (**2**) (THF- $d_6$ , 151 MHz)

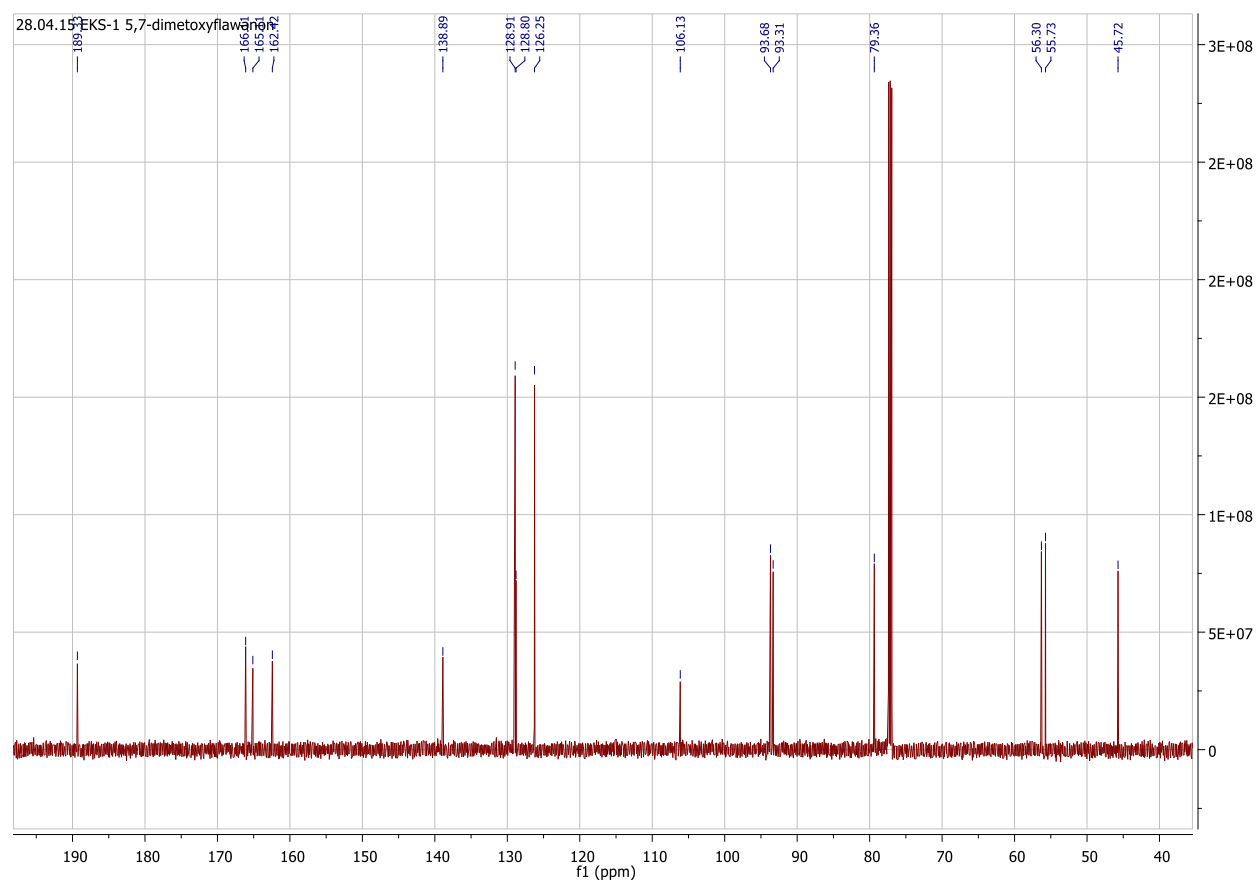

Figure S5.  $^1\text{H}$  NMR spectrum of 2'-hydroxy-3-methoxychalcone (**3**) ( $\text{CDCl}_3$ , 600 MHz)

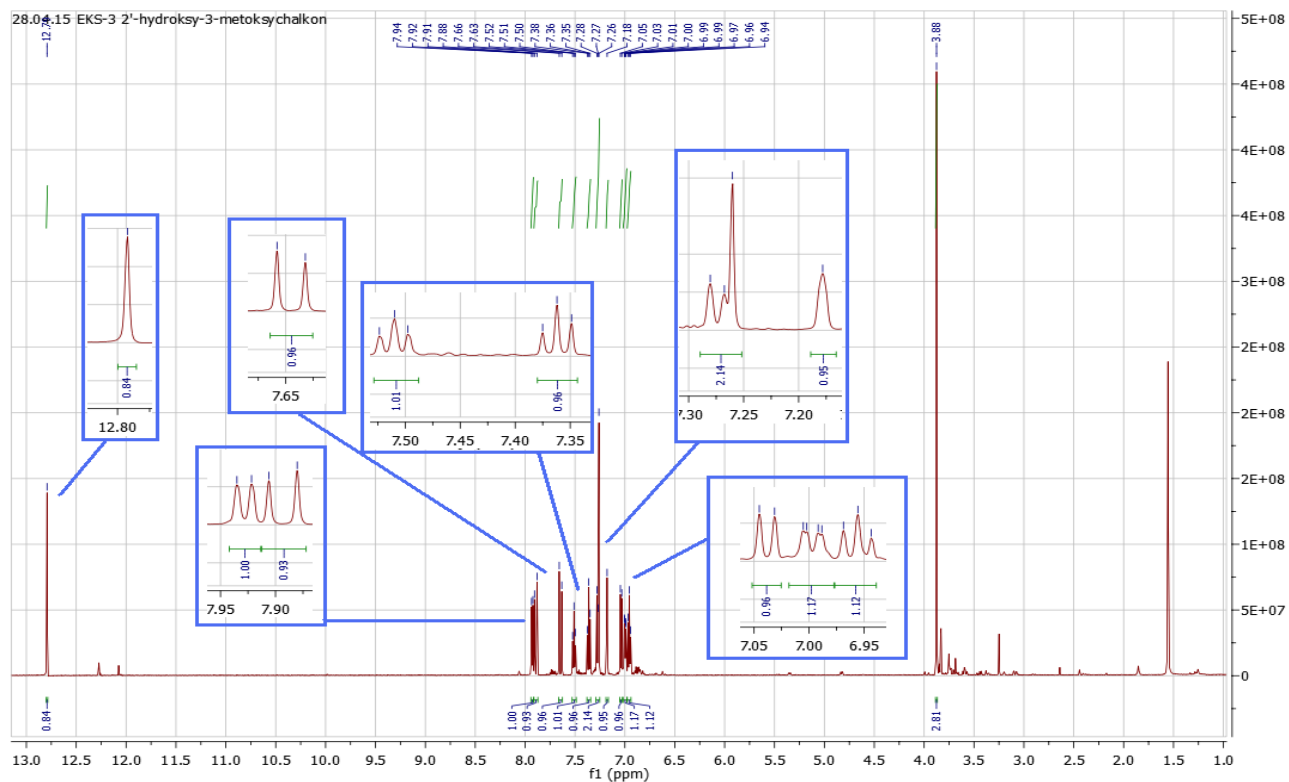

Figure S6.  $^{13}\text{C}$  NMR spectrum of 2'-hydroxy-3-methoxychalcone (**3**) ( $\text{CDCl}_3$ , 151 MHz)

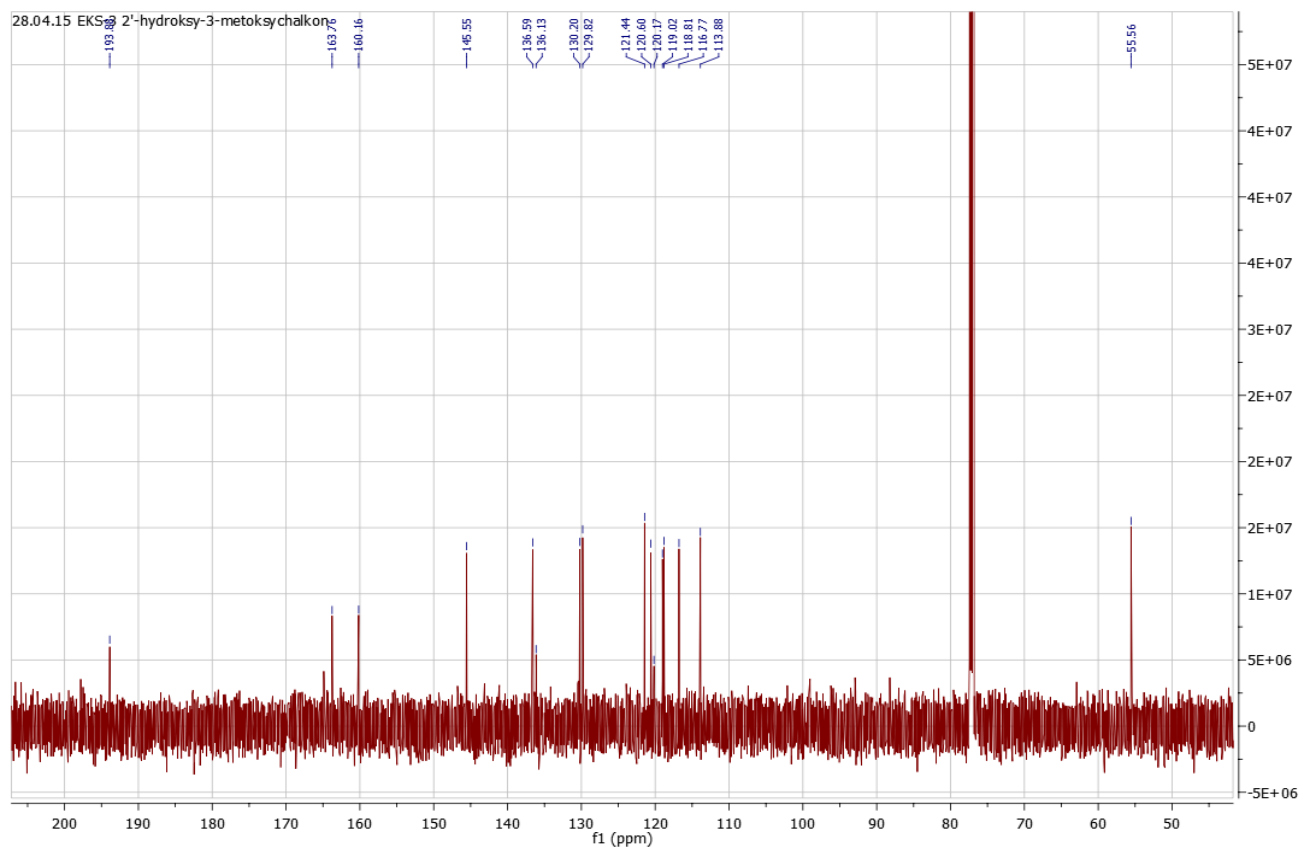

Figure S7.  $^1\text{H}$  NMR spectrum of 2'-hydroxy-4'-methoxychalcone (**4**) ( $\text{CDCl}_3$ , 600 MHz)

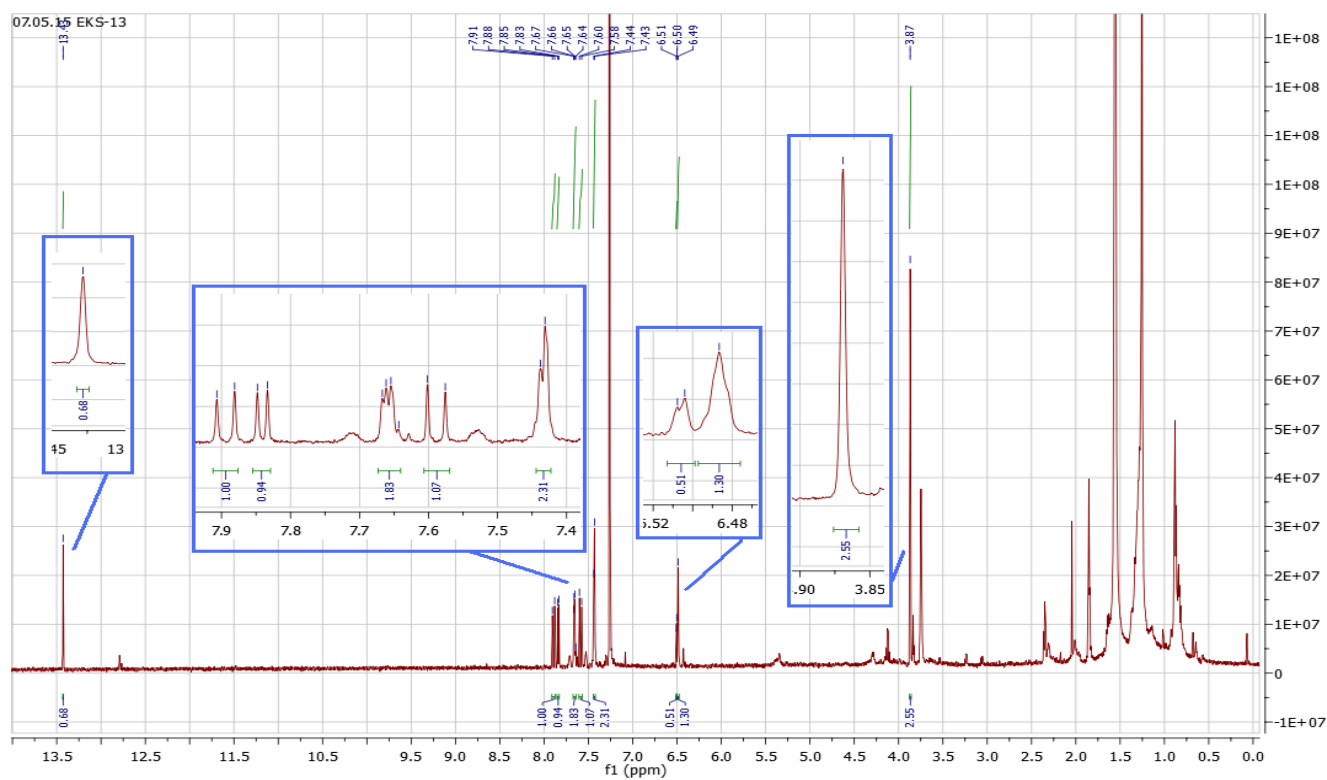

Figure S8.  $^{13}\text{C}$  NMR spectrum of 2'-hydroxy-4'-methoxychalcone (**4**) ( $\text{CDCl}_3$ , 151 MHz)

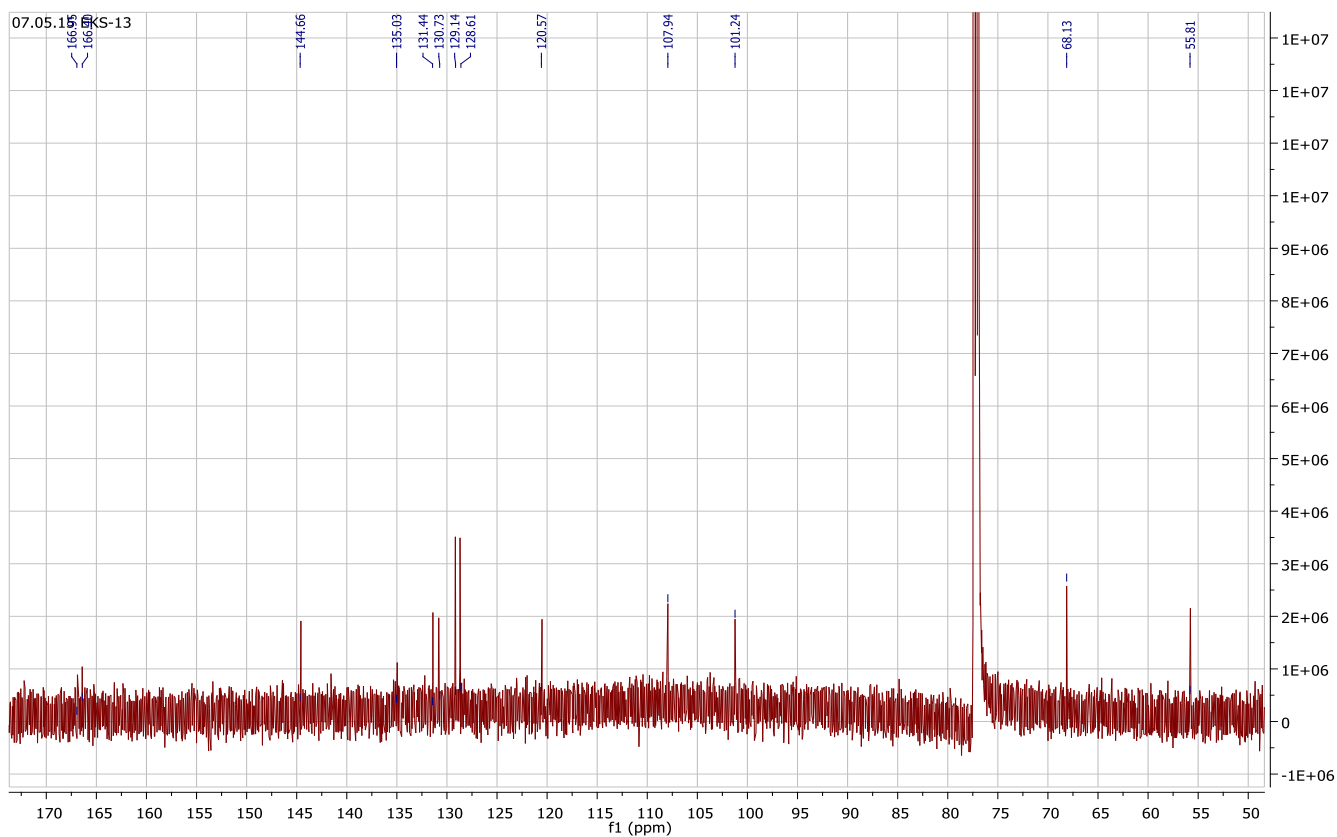

Figure S9. <sup>1</sup>H NMR spectrum of 2'-hydroxy-4'-methoxydihydrochalcone (5) (CDCl<sub>3</sub>, 600 MHz)

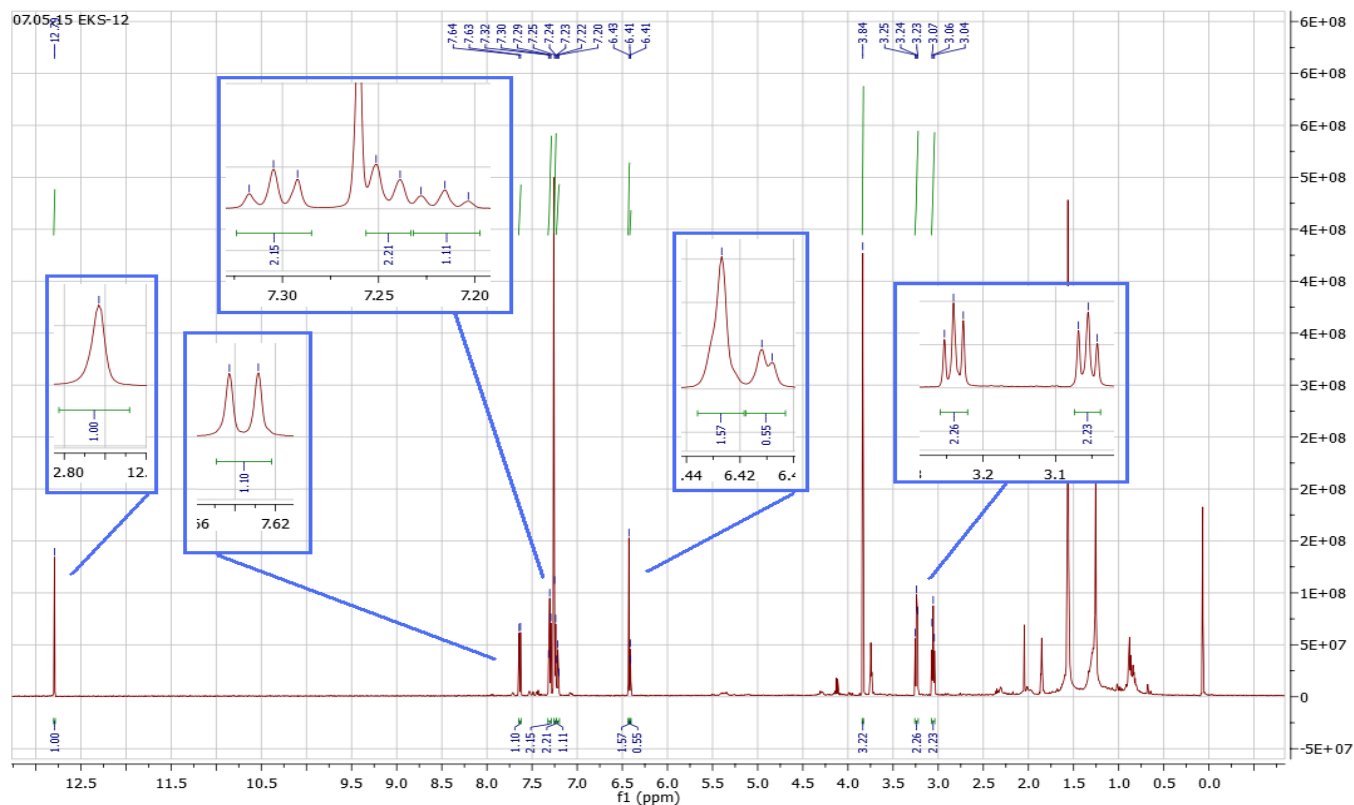

Figure S10. <sup>13</sup>C NMR spectrum of 2'-hydroxy-4'-methoxydihydrochalcone (5) (CDCl<sub>3</sub>, 151 MHz)

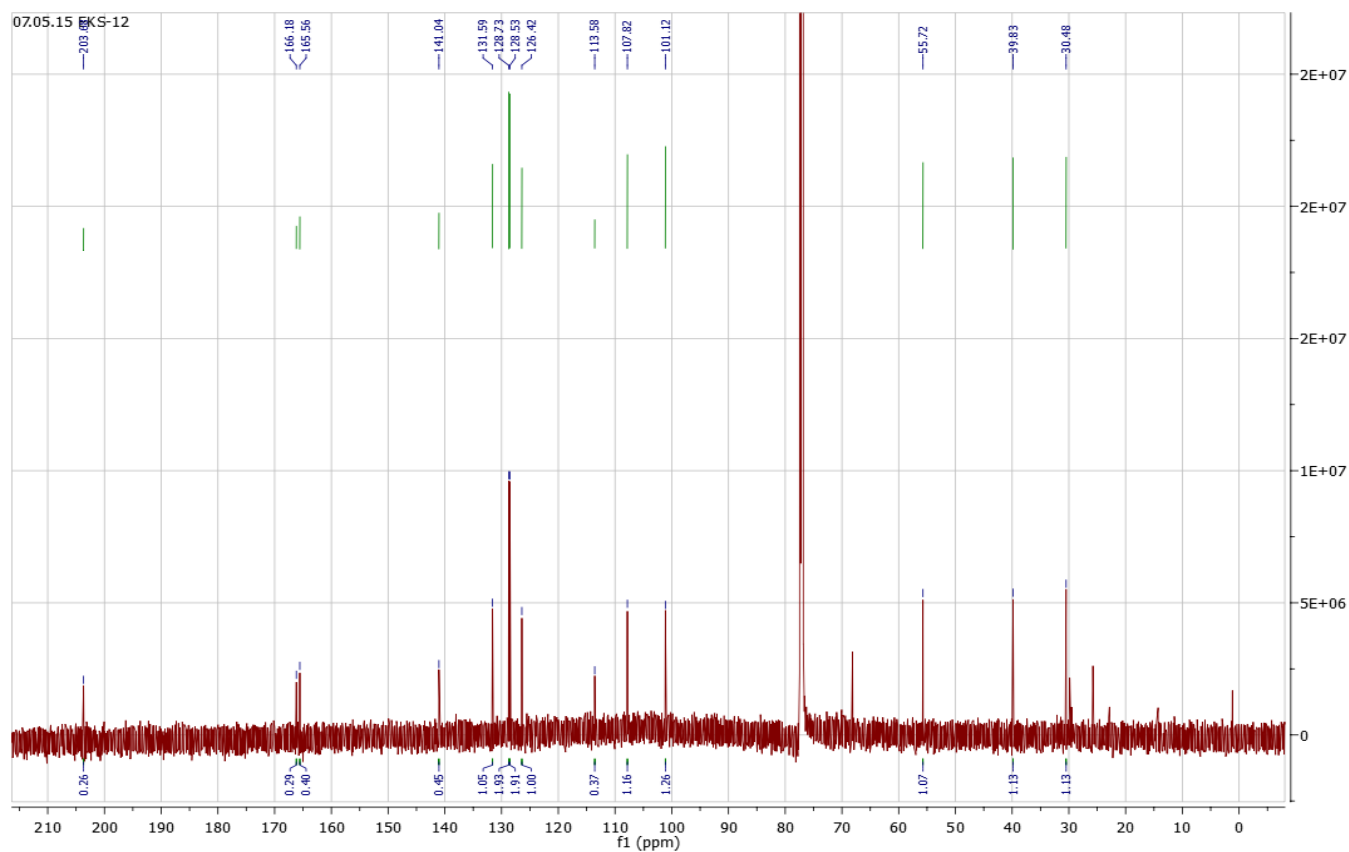

Figure S11.  $^1\text{H}$  NMR spectrum of 3,7,8-trihydroxyflavone (**6**) ( $\text{CDCl}_3$ , 600 MHz)

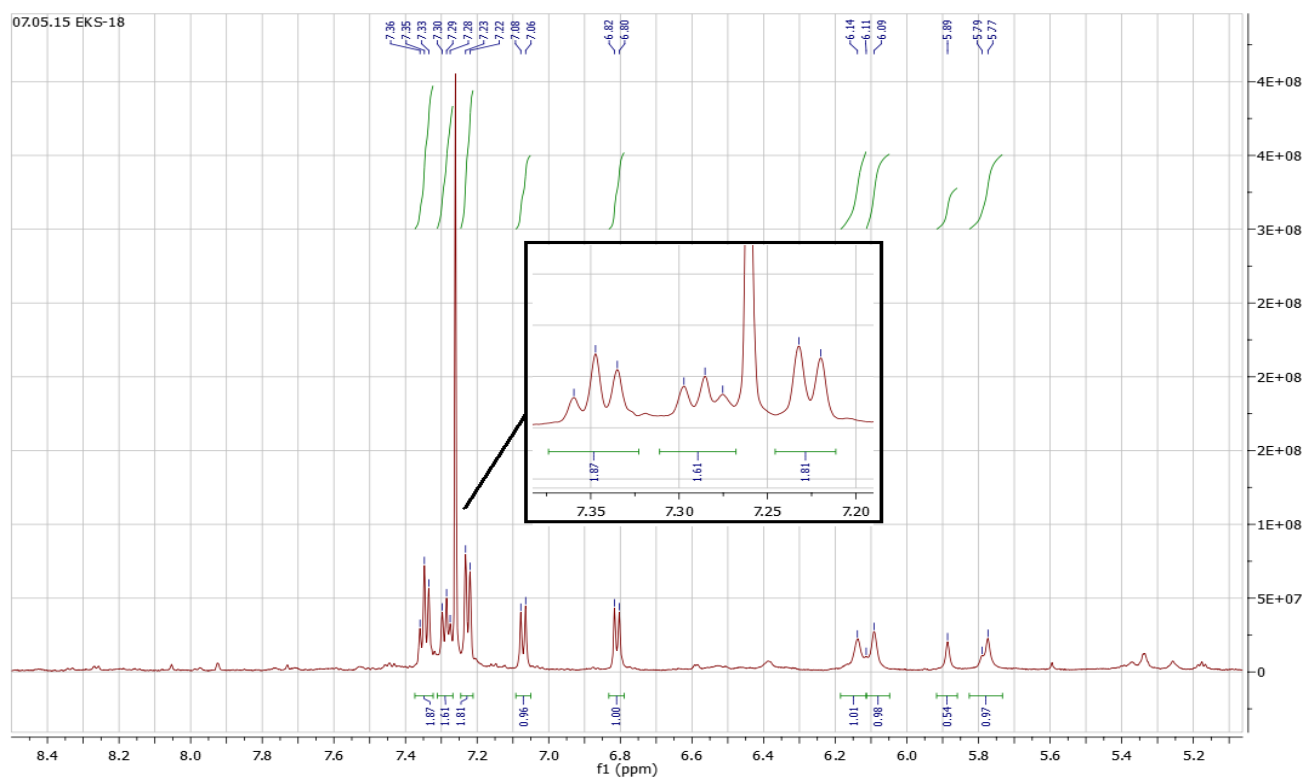

Figure S12.  $^{13}\text{C}$  NMR spectrum of 3,7,8-trihydroxyflavone (**6**) ( $\text{CDCl}_3$ , 151 MHz)

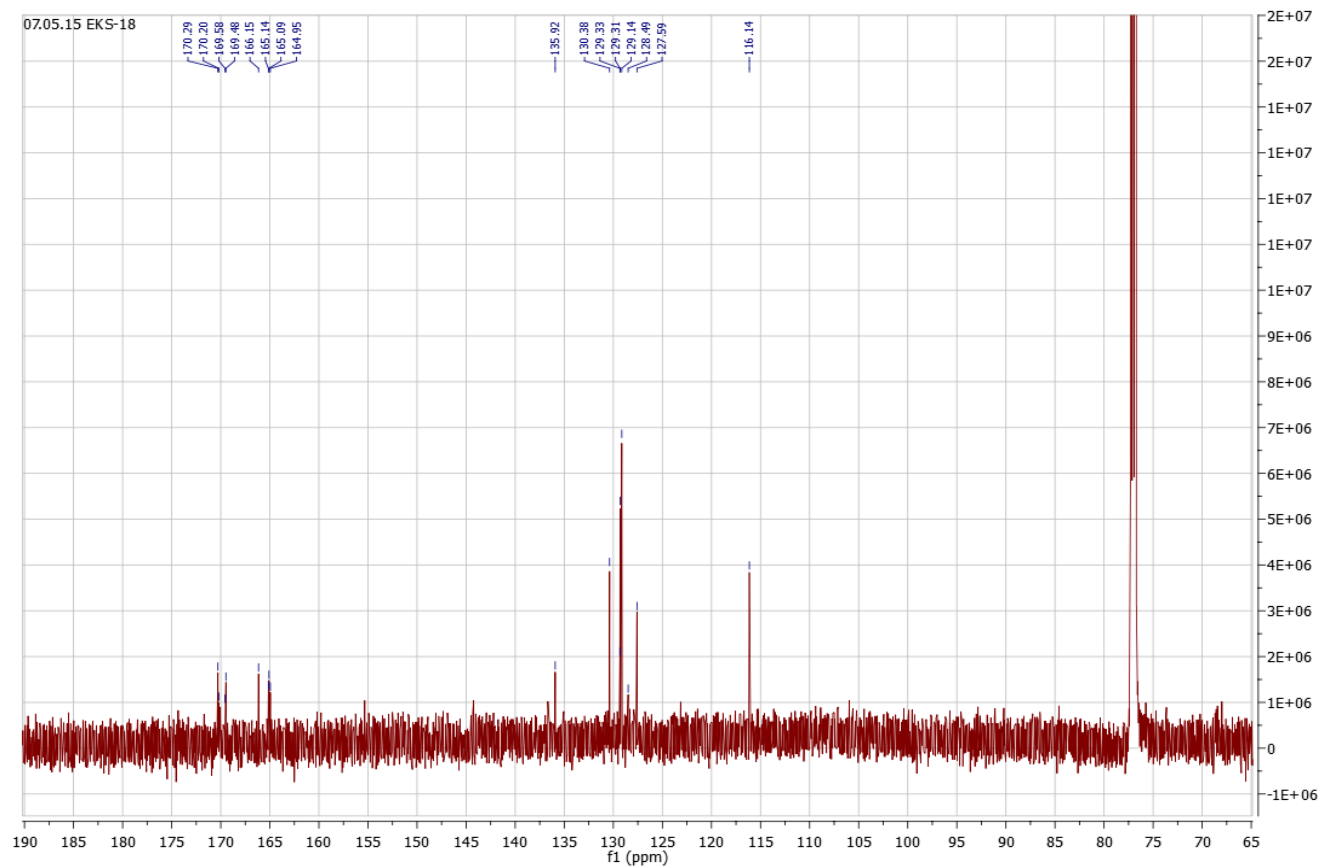

Figure S13. <sup>1</sup>H NMR spectrum of 7-hydroxyflavanone (7) (THF, 600 MHz)

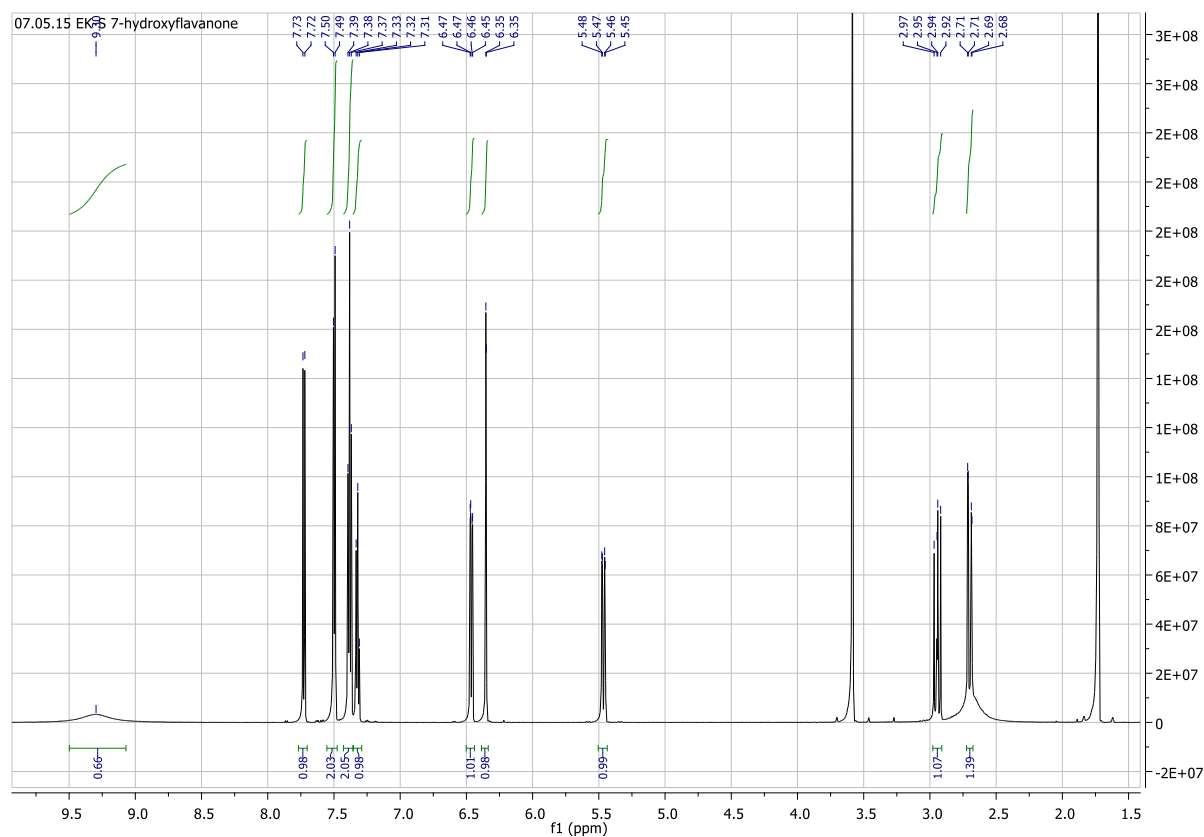

Figure S14. <sup>13</sup>C NMR spectrum of 7-hydroxyflavanone (7) (THF, 151 MHz)

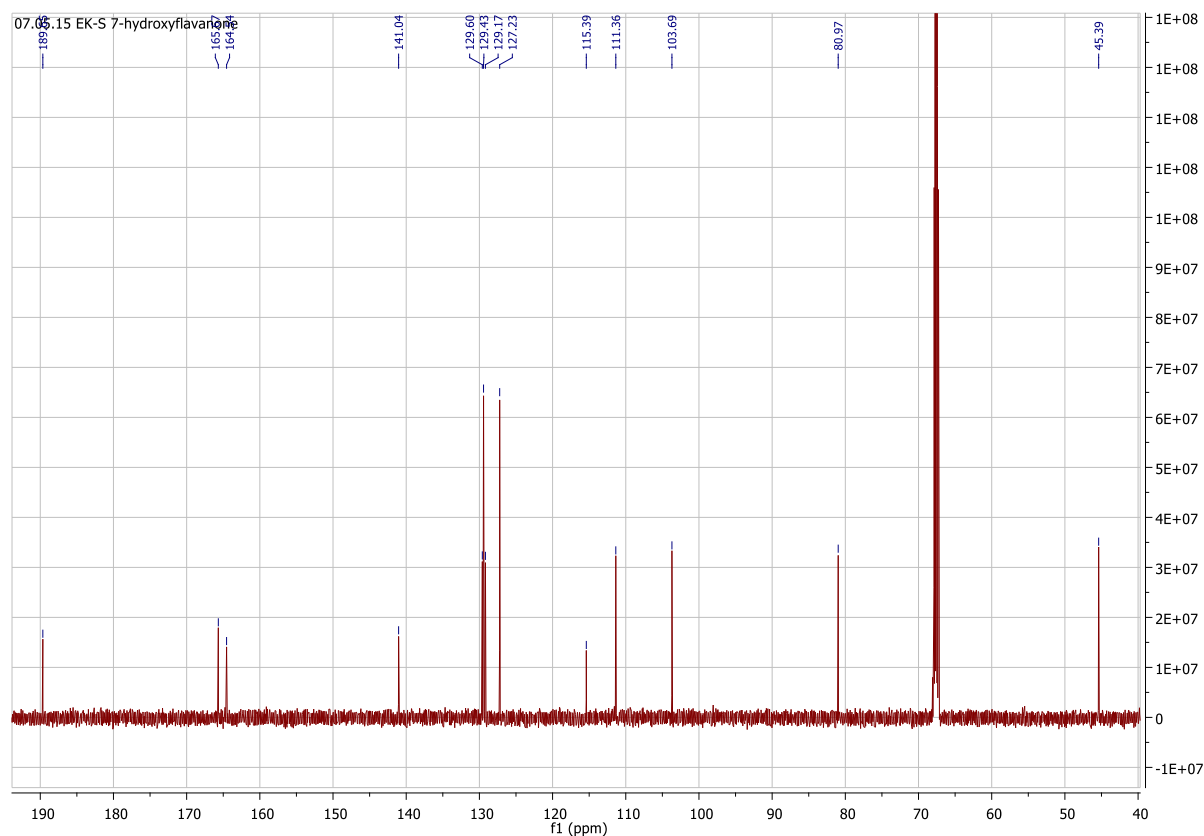



Figure S15.  $^1\text{H}$  NMR spectrum of 2'-hydroxy-4', 6'-dimethoxychalcone (**8**) ( $\text{CDCl}_3$ , 600 MHz)

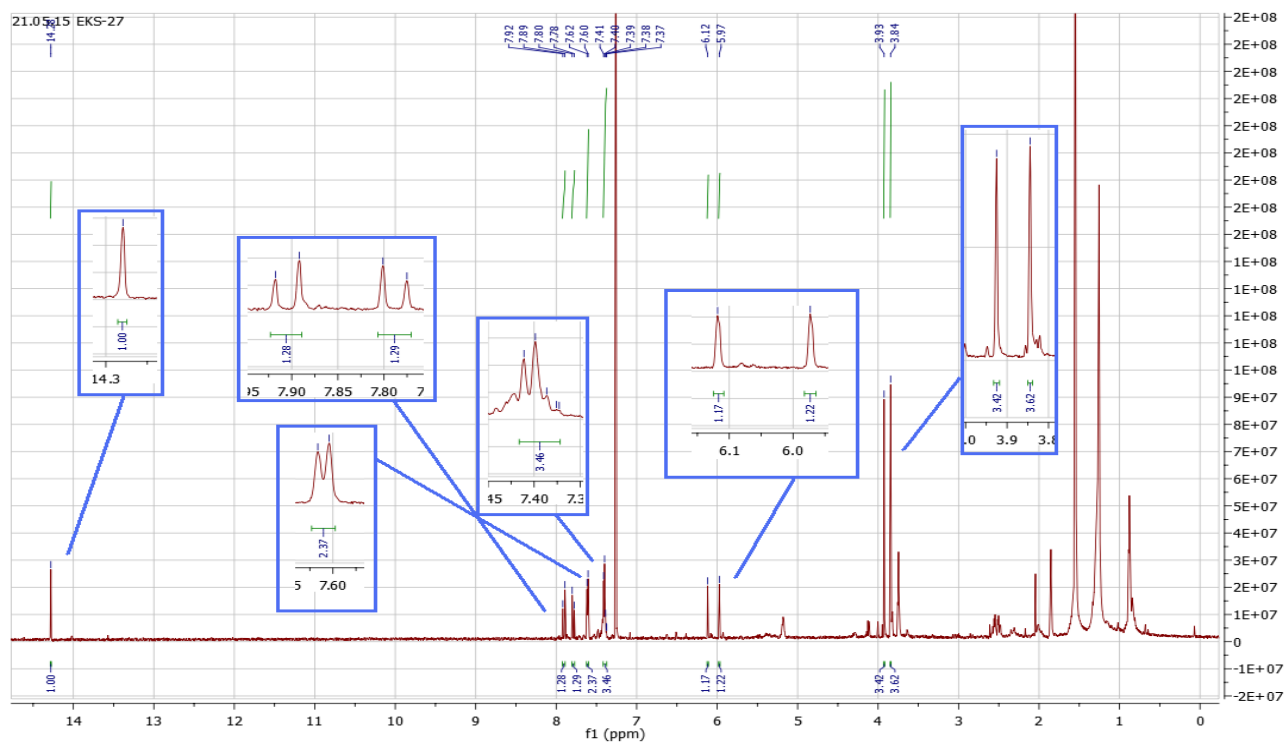

Figure S16.  $^{13}\text{C}$  NMR spectrum of 2'-hydroxy-4', 6'-dimethoxychalcone (**8**) ( $\text{CDCl}_3$ , 151 MHz)

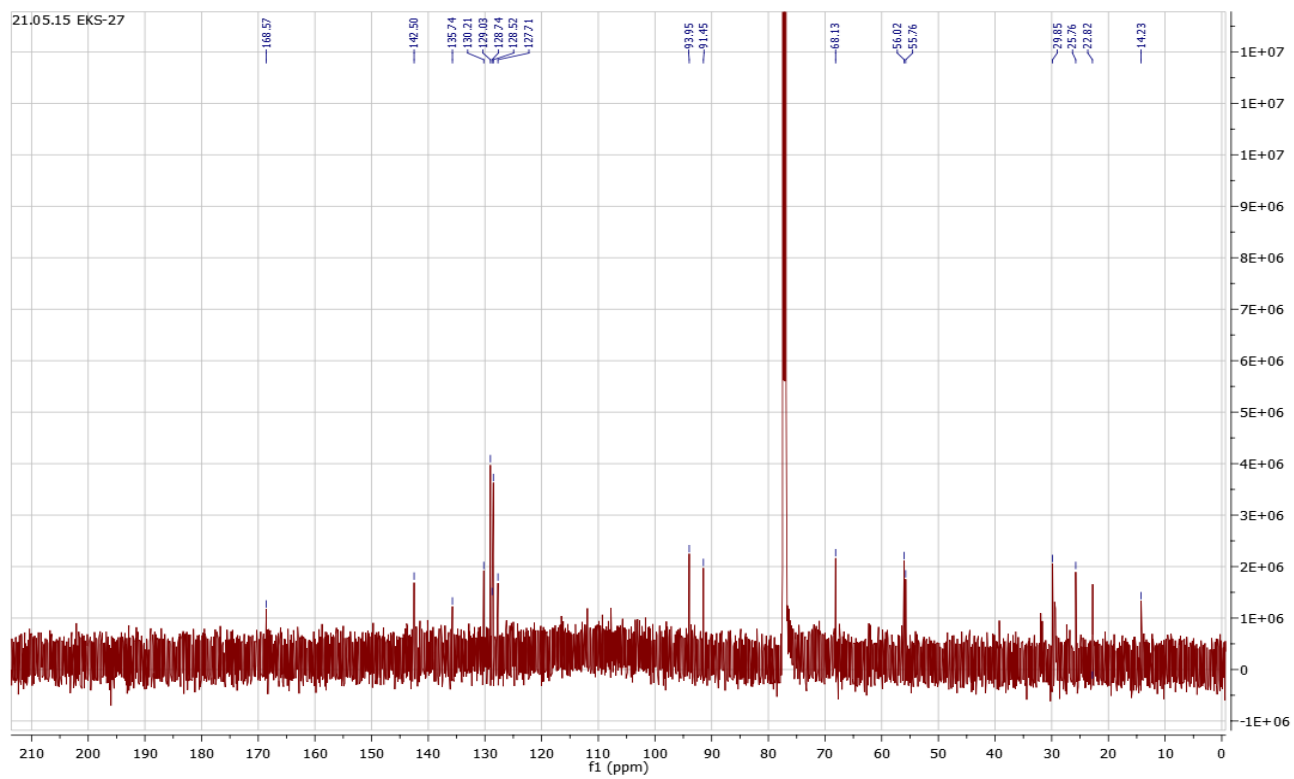

Figure S17.  $^1\text{H}$  NMR spectrum of 2'-hydroxy-4',6'-dimethoxydihydrochalcone (9) ( $\text{CDCl}_3$ , 600 MHz)

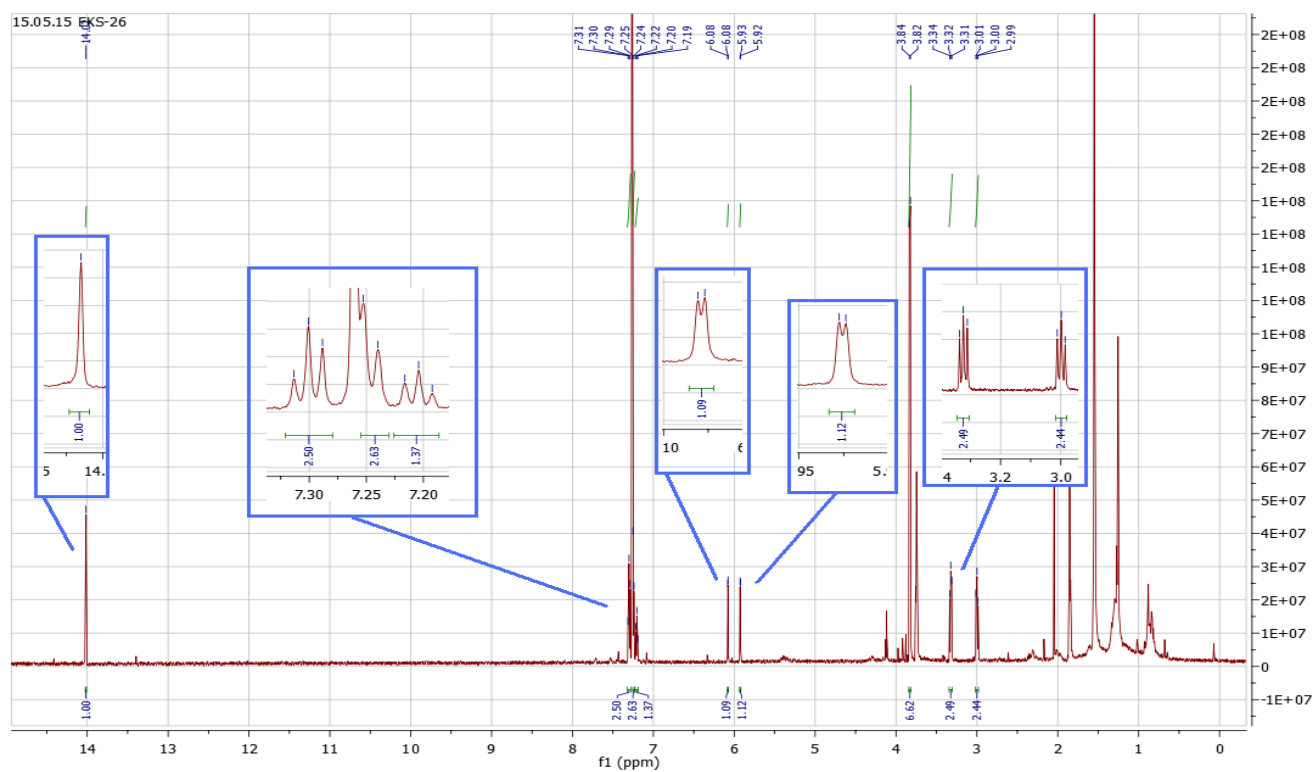

Figure S18.  $^{13}\text{C}$  NMR spectrum of 2'-hydroxy-4',6'-dimethoxydihydrochalcone (9) ( $\text{CDCl}_3$ , 151 MHz)

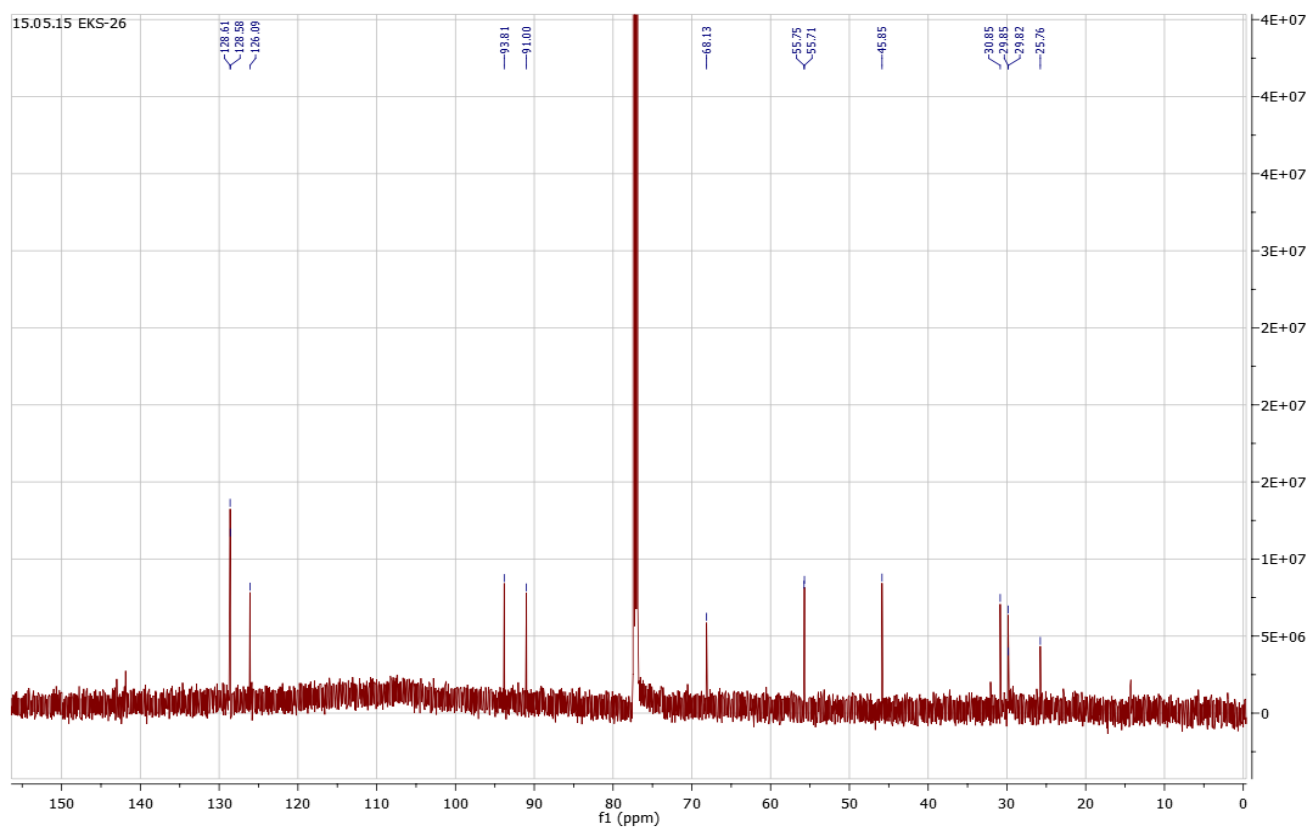



Figure S21. <sup>1</sup>H NMR spectrum of 3'-methoxyflavanone (**11**) (CDCl<sub>3</sub>, 600 MHz)

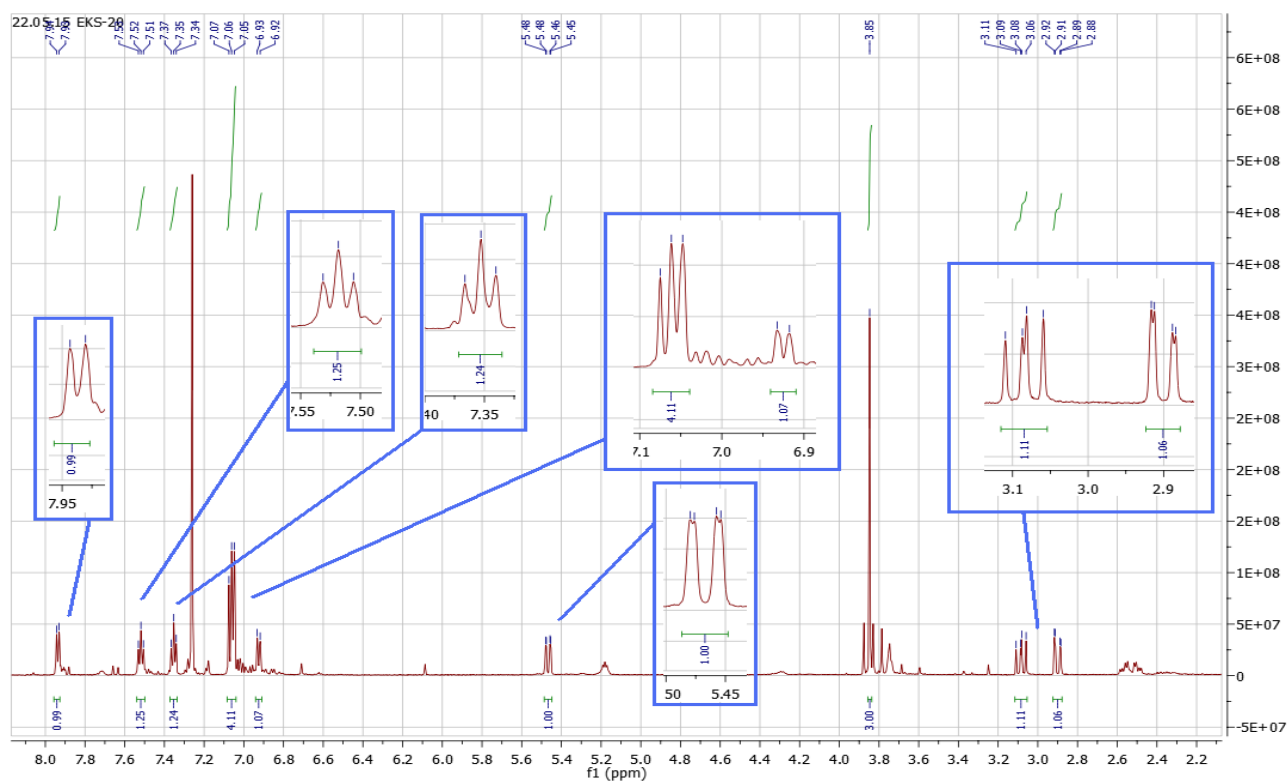

Figure S22. <sup>13</sup>C NMR spectrum of 3'-methoxyflavanone (**11**) (CDCl<sub>3</sub>, 151 MHz)

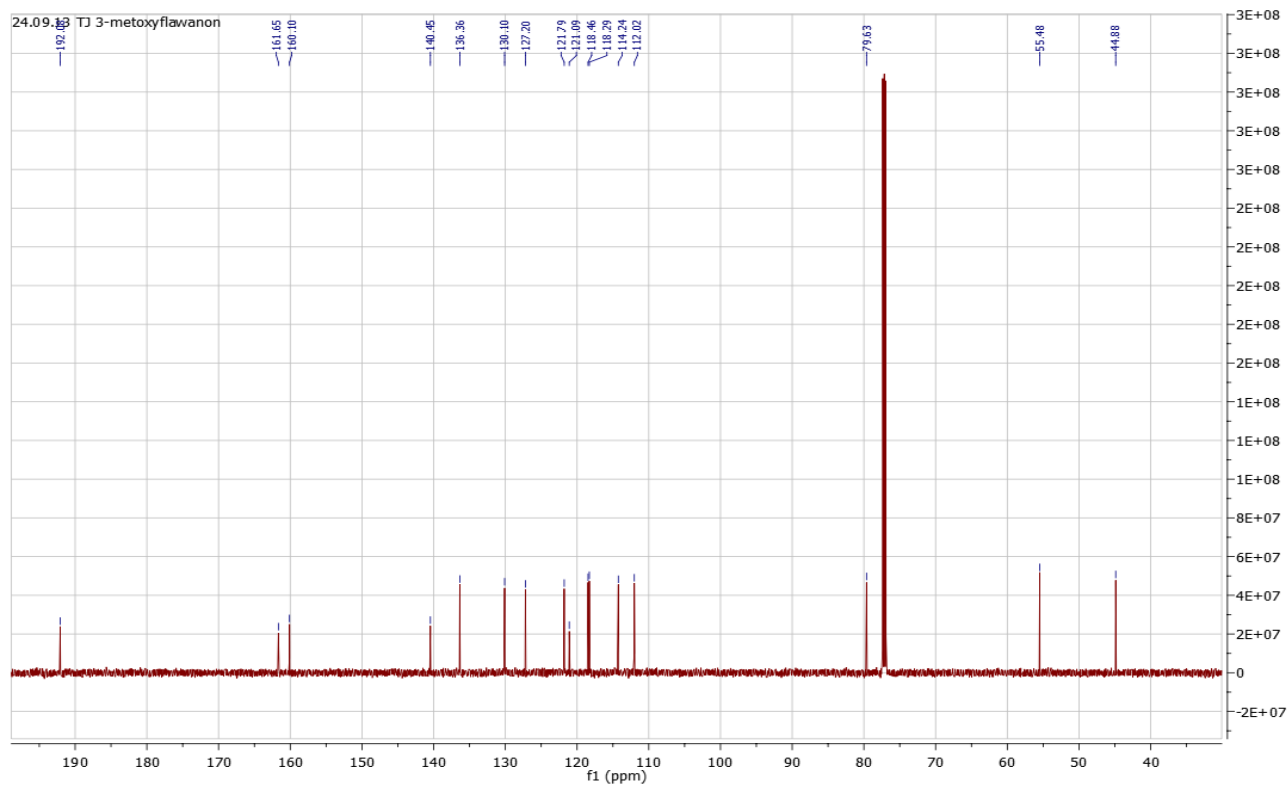

Supplement: molecules-22-01830-s001.pdf [file molecules-22-01830-s001.pdf]
